# Supplementary material
Source: Springer Nature journal article supplement (https://www.springermedizin.de/resource/supplementary/13012_2014_781_MOESM4_ESM.pdf/9630680)
Supplement: MOESM4 [file 9630680]

# Macro environment

Health system

Expected outcomes of ITW

Social system

## CONTEXT

Characteristics  
of the patients

Characteristics  
of the team

Characteristics  
of the  
organization

## MECHANISMS

Communication

Coordination

Patient/family centred  
care

Negotiations/  
adjustments

Scientific knowledge  
utilization

Others  
unforeseen

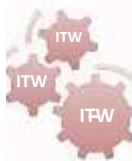

P  
R  
I  
O  
R  
I  
T  
Y  
  
G  
U  
I  
D  
E  
L  
I  
N  
E  
S

P  
Q  
L  
C<sup>1</sup>

Observed Outcomes

**Responsiveness – Continuity – Care outcomes – Capacity for self-care – Others**

<sup>1</sup>) Programme québécoise de lutte contre le cancer (Quebec Cancer Program)
